# Supplementary material
Source: PubMed Central journal article supplement (PMC9444345)
Supplement: NIHMS1829186-supplement-SI.pdf [file NIHMS1829186-supplement-SI.pdf]

SUPPORTING INFORMATION FOR:

RNA Post-transcriptional Modifications in Two Large Subunit  
Intermediates Populated in *E.coli* Cells Expressing Helicase Inactive  
R331A DbpA

Eda Koculi<sup>1\*</sup> and Samuel S. Cho<sup>2,3</sup>

<sup>1</sup>Department of Biochemistry and Molecular Biology, Johns Hopkins University Bloomberg  
School of Public Health, Baltimore, MD 21205, USA

<sup>2</sup>Department of Physics, Wake Forest University, Winston-Salem, NC 27109, USA

<sup>3</sup>Department of Computer Science, Wake Forest University, Winston-Salem, NC 27109, USA

\*To whom the correspondence should be addressed.

Email: [ekoculi1@jhu.edu](mailto:ekoculi1@jhu.edu)

**Table SI 1.** Mutation rates for the OH<sup>5</sup>C 2505 nucleotide treated with KMnO<sub>4</sub>.

|                            | KMnO <sub>4</sub> |               | No Chemical Treatment |
|----------------------------|-------------------|---------------|-----------------------|
|                            | 3 minutes         | 6 minutes     |                       |
| Mutation rate <sup>a</sup> | 0.466 ± 0.005     | 0.453 ± 0.005 | 0.007 ± 0.001         |

<sup>a</sup> The mutation rates for the samples treated with KMnO<sub>4</sub> for 3 or 6 minutes and the untreated control sample. The errors shown for each experiment are calculated using the equation<sup>1</sup>

$$\frac{\sqrt[2]{\text{mutation rate}}}{\sqrt[2]{\text{read depth}}}$$

**Table SI 2.** Mutation rates for the m<sup>3</sup>Ψ 1919 nucleotide treated with CMCT plus NaHCO<sub>3</sub>, or only with NaHCO<sub>3</sub>.

|                            | Particle | Chemical Treatment       |                 |
|----------------------------|----------|--------------------------|-----------------|
|                            |          | CMCT and OH <sup>-</sup> | OH <sup>-</sup> |
| Mutation rate <sup>a</sup> | 35S      | 0.094 ± 0.006            | 0.158 ± 0.006   |
|                            | 45S      | 0.076 ± 0.004            | 0.106 ± 0.003   |
|                            | 50S      | 0.602 ± 0.011            | 0.703 ± 0.012   |

<sup>a</sup> The errors shown here are for each experiment and are calculated using the equation<sup>1</sup>

$$\frac{\sqrt{\text{mutation rate}}}{\sqrt{\text{read depth}}}$$

**Table SI 3.** Mutation rates' confidence intervals of 23S rRNA modified nucleotides.

| Modified <sup>a</sup><br>Nucleotide | Enzyme <sup>b</sup> | 95% Confidence Interval <sup>c</sup> |               |               |
|-------------------------------------|---------------------|--------------------------------------|---------------|---------------|
|                                     |                     | 35S                                  | 45S           | 50S           |
| Ψ 748                               | RluA                | 0.026 ± 0.013                        | 0.030 ± 0.001 | 0.029 ± 0.001 |
| Ψ 957                               | RluC                | 0.242 ± 0.032                        | 0.247 ± 0.009 | 0.261 ± 0.016 |
| Ψ 1915                              | RluD                | 0.013 ± 0.001                        | 0.011 ± 0.003 | 0.039 ± 0.007 |
| <sup>d</sup> m <sup>3</sup> Ψ 1919  | RluD/RlmH           | 0.097 ± 0.006                        | 0.077 ± 0.001 | 0.605 ± 0.006 |
| Ψ 1921                              | RluD                | 0.042 ± 0.004                        | 0.024 ± 0.001 | 0.156 ± 0.008 |
| Ψ 2461                              | RluE                | 0.090 ± 0.006                        | 0.098 ± 0.002 | 0.108 ± 0.004 |
| OH <sup>5</sup> C 2505              | RlhA                | 0.070 ± 0.003                        | 0.108 ± 0.002 | 0.265 ± 0.008 |
| m <sup>2</sup> A 2507               | RlmN                | 0.083 ± 0.000                        | 0.097 ± 0.001 | 0.090 ± 0.011 |
| Ψ 2508                              | RluC                | 0.105 ± 0.022                        | 0.118 ± 0.008 | 0.080 ± 0.000 |
| Ψ 2584                              | RluC                | 0.324 ± 0.000                        | 0.322 ± 0.001 | 0.322 ± 0.014 |
| Ψ 2608                              | RluF                | 0.029 ± 0.002                        | 0.025 ± 0.003 | 0.034 ± 0.001 |
| Ψ 2609                              | RluB                | 0.067 ± 0.005                        | 0.055 ± 0.002 | 0.070 ± 0.000 |

<sup>a</sup> 23S rRNA modified nucleotides investigated in this study.

<sup>b</sup> Enzymes incorporating the modifications.

<sup>c</sup> 95% confidence interval was calculated using the equation:

$$Avg_{(i)(p)} \pm 1.96 \times Std_{(i)(p)} / \sqrt{n}$$

$Avg_{(i)(p)}$  is the average mutation rate for nucleotide *i* of particle *p*,  $Std_{(i)(p)}$  is the standard deviation error for the nucleotide *i* of particle *p*. The average and the standard deviation were calculated using Equations 2 and 3 in the Materials and Methods section of the paper. *n* is the number of independent experiments, which is 2.

<sup>d</sup> The RluD enzyme performs the U 1919 to Ψ isomerization, while the RlmH enzyme methylates Ψ 1919 at position N3.

[1] Busan, S., and Weeks, K. M. (2018) Accurate detection of chemical modifications in RNA by mutational profiling (MaP) with ShapeMapper 2, *RNA* 24, 143-148.
